1 ***Salmonella* Typhi acquires diverse plasmids from other Enterobacteriaceae to develop**  
2 **cephalosporin resistance**

3 Jobin John Jacob<sup>1#</sup>, Agila K Pragasam<sup>1#</sup>, Karthick Vasudevan<sup>1</sup>, Balaji Veeraraghavan<sup>1\*</sup>,  
4 Gagandeep Kang<sup>2,3</sup>, Jacob John<sup>2</sup>, Vasant Nagvekar<sup>4</sup>, Ankur Mutreja<sup>5</sup>

5 <sup>1</sup>Department of Clinical Microbiology, Christian Medical College, Vellore, Tamil Nadu, India

6 <sup>2</sup>Wellcome Trust Research Laboratory, Department of Gastrointestinal Sciences,  
7 Christian Medical College, Vellore, Tamil Nadu, India

8 <sup>3</sup>Translational Health Science and Technology Institute, Faridabad, India

9 <sup>4</sup>Department of Physician/Internal Medicine, Lilavati Hospital & Research Centre, Mumbai,  
10 India

11 <sup>5</sup>Department of Medicine, University of Cambridge, Cambridge, United Kingdom

12

13

14 Dr. Balaji Veeraraghavan

15 Professor

16 Department of Clinical Microbiology

17 Christian Medical College

18 Vellore – 632 004

19 Tamil Nadu, India

20 Ph: +91 9442210555

21 E-mail: [ybalaji@cmcvellore.ac.in](mailto:ybalaji@cmcvellore.ac.in)

22 # Authors contributed equally to this manuscript

23 **Abstract:**

24 **Background:** Recent reports have established the emergence and dissemination of extensively  
25 drug resistant (XDR) H58 *Salmonella* Typhi clone in Pakistan. In India where typhoid fever is  
26 endemic, only sporadic cases of ceftriaxone resistant *S. Typhi* are reported. This study aimed at  
27 elucidating the phylogenetic evolutionary framework of ceftriaxone resistant *S. Typhi* isolates  
28 from India to predict their potential dissemination in endemic regions.

29 **Methods:** Five ceftriaxone resistant *S. Typhi* isolates from three tertiary care hospitals in India  
30 were sequenced on an Ion Torrent Personal Genome Machine (PGM). A core genome single-  
31 nucleotide-polymorphism (SNP) based phylogeny of the isolates in comparison to the global  
32 collection of MDR and XDR *S. Typhi* isolates was built. Two of five isolates were additionally  
33 sequenced using Oxford Nanopore MinION to completely characterize the plasmid and  
34 understand its transmission dynamics within Enterobacteriaceae.

35 **Results:** Comparative genomic analysis and detailed plasmid characterization indicate that while  
36 in Pakistan (4.3.1 lineage I) the XDR trait is associated with *bla*<sub>CTX-M-15</sub> gene on IncY plasmid, in  
37 India (4.3.1 lineage II), the ceftriaxone resistance is due to short term adaptation of resistance  
38 plasmids such as IncX3 or IncN.

39 **Conclusion:** Since the bacterial acquisition of smaller resistance plasmids such as IncX3 or IncN  
40 from other Enterobacteriaceae can be much faster than the larger IncY plasmids, the rapid  
41 expansion of these genotypically novel XDR *S. Typhi* could potentially cause large outbreaks.  
42 Therefore, continuous monitoring of *S. Typhi* lineages carrying cephalosporin resistance on  
43 IncX3 or IncN plasmids is vital not just for India but globally.

44 **Keywords:** *Salmonella* Typhi; Typhoid fever; cephalosporin resistance; XDR; India, H58  
45 lineages

## 46 **Importance**

47 Genomic analysis of cephalosporin resistant *S. Typhi* isolated from India indicates the potential  
48 of *S. Typhi* to develop cephalosporin resistance by acquiring diverse plasmids from other  
49 Enterobacteriaceae. We identified the occurrence of independent acquisition of drug-resistant  
50 plasmids such as IncX3 and IncN with genes encoding beta-lactamases in H58/4.3.1.2 lineage. A  
51 short term adaptation of drug-resistant plasmids in H58/4.3.1.2 lineage can be the reason for the  
52 sporadic cases cephalosporin resistant *S. Typhi* in India. However, the IncY plasmid acquired by  
53 isolates that belong to H58/4.3.1.1 lineage appeared to be well adapted as observed in XDR *S.*  
54 *Typhi* outbreak in Pakistan. Plasmid acquisition and maintenance of cephalosporin resistant *S.*  
55 *Typhi* appears to be specific to the phylogenetic lineage as lineages differ in compensating the  
56 initial cost imposed by the plasmid. The stable maintenance of these resistance plasmids without  
57 a fitness cost, are determinant in understanding the future spread of cephalosporin resistance in *S.*  
58 *Typhi*. Therefore, critical strategies in monitoring and control of cephalosporin resistant *S. Typhi*  
59 is needed to tackle further public health crisis.

60

## 61 **Introduction**

62 Enteric fever is a severe systemic infection caused primarily by *Salmonella enterica*  
63 serovar Typhi and, serovar Paratyphi A [1]. These typhoidal serovars are restricted to human  
64 hosts and typically occur in low and middle – income countries (LMIC) [2]. Although direct  
65 faecal-oral route is the predominant mode of transmission, recent reports suggest that indirect

66 transmission may also occur as the bacteria can survive for extended periods in the environment  
67 [3]. The global burden of typhoid fever is estimated to be between 11 and 21 million with 128,  
68 000 to 161, 000 deaths annually (WHO, 2019). Global data suggests that the majority of the  
69 reported enteric fever morbidity and mortality takes place in endemic regions of South Asian,  
70 Southeast Asian and African countries [4].

71 The management of enteric fever is challenging due to the emergence of antibiotic  
72 resistant *S. Typhi* strains and their changing resistance profiles [5]. The indiscriminate use of first  
73 line antimicrobial agents (ampicillin, chloramphenicol and co-trimoxazole) during the 1960s led  
74 to the emergence of multi drug resistance (MDR) in sporadic cases initially, followed by larger  
75 outbreaks during 1970-1990 [6]. Fluoroquinolones (FQs), such as ciprofloxacin, then became the  
76 drug of choice for treatment of MDR *S. Typhi*. However, the decreased ciprofloxacin  
77 susceptibility (DCS) phenotype became dominant globally within a few years, resulting in  
78 clinical failures [7]. Currently, ceftriaxone and azithromycin are the drugs of choice. However,  
79 there are increasing reports of ceftriaxone resistant and azithromycin resistant *S. Typhi* [8].

80 *S. Typhi* isolates with extensive drug resistance (XDR) have emerged in Sindh, Pakistan,  
81 with resistance to ampicillin, chloramphenicol, co-trimoxazole, fluoroquinolones and third-  
82 generation cephalosporins [9]. This large scale outbreak reported a total of 5274 XDR *S. Typhi*  
83 cases between 2016 and 2018 (WHO, 2018). The XDR *S. Typhi* isolates carried an IncY plasmid  
84 harboring a *bla*<sub>CTX-M-15</sub> and *qnrS1* gene while the antimicrobial resistance (AMR) cassette  
85 conferring resistance to first-line drugs was integrated into the chromosome as a composite  
86 transposon [9, 10]. In India where typhoid fever is endemic, only sporadic cases of ceftriaxone  
87 resistant *S. Typhi* have been reported [11-13].

88           Until recently, phylogenetic inferences of the evolution of cephalosporin resistant *S.*  
89 Typhi were limited to the reported XDR *S. Typhi* outbreak in Pakistan [9], possibly because only  
90 sporadic cases are reported across other locations in South Asia. Since *S. Typhi* H58 lineage can  
91 acquire MDR plasmids (p60006) from other Enterobacteriaceae, this event could also occur in  
92 other regions of Asia where typhoid is endemic [9]. Our study investigated the  
93 evolutionary trajectories of cephalosporin resistance in *S. Typhi* with special reference to the  
94 endemic regions in South Asia. We also investigated the role of plasmid in this clonal expansion  
95 to predict the possibility of the rise and spread of cephalosporin resistant *S. Typhi* in India.

## 96 **Materials and Methods**

### 97 **Bacterial Isolates, Identification and AST**

98           Five clinical isolates of ceftriaxone resistant *Salmonella Typhi* from three different  
99 tertiary care hospitals in India between 2015 and 2018 were confirmed by serotyping according  
100 to the *Kauffmann-White* scheme [14] and standard microbiological techniques. Antimicrobial  
101 susceptibility testing (AST) was performed by using agar disk diffusion (DD) method for six  
102 antimicrobial agents including ampicillin (10 µg), chloramphenicol (30 µg), co-trimoxazole  
103 (1.25/23.75 µg), ciprofloxacin (5 µg), ceftriaxone (30 µg) and azithromycin (5 µg). Minimum  
104 inhibitory concentration (MIC) for ceftriaxone was determined using the broth micro dilution  
105 (BMD) method in accordance with the Clinical and Laboratory Standards Institute (CLSI) 2018  
106 guidelines and interpretative criteria [15].

### 107 **DNA Extraction and Whole genome sequencing**

108 Genomic DNA of the study isolates was extracted from an overnight culture (14 - 16 hrs)  
109 grown at 37°C on blood agar, using the QIAamp DNA Mini Kit (Qiagen, Hilden, Germany)  
110 according to the manufacturer's protocol. The extracted DNA was subjected to whole genome  
111 sequencing (WGS) using the Ion Torrent PGM sequencer (Life Technologies, Carlsbad, CA)  
112 with 400 bp read chemistry. Two of five isolates were sequenced using the Oxford Nanopore  
113 MinION sequencer (ONT, Oxford, UK) per standard protocol to fully resolve the plasmid  
114 structure.

### 115 **Genome assembly, Genotyping and Plasmid typing**

116 Hybrid genome assembly was carried out according to the standardized protocol  
117 developed in-house [16] using Unicycler hybrid assembly pipeline (v0.4.6). Ion torrent reads  
118 assembly was achieved *de novo* in the SPAdes assembler (v 5.0.0.0) embedded in the Torrent  
119 suite server (v.5.0.3). The quality metrics of the assembled genome was analysed using  
120 Quast(v.4.5) and genomes were annotated using Prokaryotic genome annotation pipeline (PGAP  
121 v.4.9) before being submitted to NCBI.

122 *In-silico* Multi-Locus Sequence Typing (MLST) was determined using Enterobase  
123 database (<https://enterobase.warwick.ac.uk>) available in pubMLST. The resistance profile of the  
124 assembled genomes was identified using ResFinderv.3.1 available from  
125 (<https://cge.cbs.dtu.dk/services/ResFinder/>). Isolates were genotyped using the genotyping  
126 scheme as described on the GitHub repository (<https://github.com/katholt/genotyphi>). Plasmid  
127 typing was carried out using Plasmid finder available from the CGE server  
128 (<https://cge.cbs.dtu.dk/services/>).

## 129 **SNP calling and Phylogenetic tree construction**

130 Core genome single-nucleotide polymorphisms (SNPs) were identified using Snippy  
131 v.0.2.6 (<https://github.com/tseemann/snippy>) with CT18 (NC\_003198) as the reference [17]. The  
132 recombination within the alignment file was filtered and removed using the Gubbins algorithm v.  
133 2.0.0 [18] and the non-recombinant SNPs, were used to construct the phylogenetic tree using  
134 Fast tree. The maximum - likelihood tree with 100 bootstrap values was rooted to the reference  
135 genome CT18 and labelled using the interactive tree of life software iTOL v.3 [19].

## 136 **Plasmid characterization and comparative genomics**

137 Plasmids from two representative isolates (One isolate each from Mumbai and Vellore)  
138 were circularized by combining the reads of Ion torrent and MinIon sequencing platforms as  
139 described earlier. The remaining three IncX3 plasmids (carried by Mumbai isolates) were  
140 extracted from short reads using plasmidSPAdes [20] with representative plasmids as the  
141 reference. The plasmid comparison was visualized and analyzed using CGview server v.1.0 [21].

142

## 143 **Results**

### 144 **Identification of ceftriaxone resistant *S. Typhi***

145 All the study isolates were phenotypically and biochemically identified as *S. Typhi* and  
146 serologically confirmed by traditional serotyping. The antimicrobial susceptibility profiling of our  
147 study isolates showed resistance to ampicillin, ceftriaxone and ciprofloxacin whilst being  
148 sensitive to chloramphenicol, co-trimoxazole and azithromycin. Among the five isolates, none

149 were MDR and all showed similar AST patterns. The demographic details and the resistance  
150 profiles of the study isolates are given in Table 1.

151 Genome based MLST analysis classified the isolates to ST1 and identified them as 4.3.1.2 (H58)  
152 genotype. Resistome analysis from the whole genome revealed the presence of *bla*<sub>SHV-12</sub>, and  
153 *qnrB7* genes in four Mumbai isolates, while the Vellore isolate carried *bla*<sub>TEM-1B</sub>, *bla*<sub>DHA-1</sub>,  
154 *qnrB4*, *aac(6)Iaa*, and *sul-1* resistance genes. Ciprofloxacin resistance could be attributed to  
155 QRDR triple mutations (*gyrA*: S83F, D87N, *parC*: S80I) for the Mumbai isolates and double  
156 mutations (*gyrA*: S83F, *parC*: E84K) for the Vellore isolate.

### 157 **Multiple, independently evolving, ceftriaxone resistant lineages circulating in India**

158 To determine the emergence of ceftriaxone resistance in Indian *S. Typhi* isolates, the  
159 phylogenetic relationship of study isolates were compared with the representative isolates (H58  
160 and non-H58) from the global *S. Typhi* collection (**Fig. 1**). Ceftriaxone resistant isolates from  
161 the recently reported XDR *S. Typhi* outbreak in the Sindh, Pakistan as well as sporadic  
162 ceftriaxone resistant isolates from Gurgaon, India and Dhaka, Bangladesh were included in the  
163 phylogenetic tree (Supplementary Table S1). The XDR *S. Typhi* isolates from Pakistan formed a  
164 distinct clade (4.3.1.1P) within the H58 lineage. Isolates reported to have originated from a direct  
165 travel history from Pakistan were also found to be in the same cluster. The two documented  
166 ceftriaxone resistant isolates from Bangladesh clustered with the non-H58 lineage along with the  
167 ceftriaxone sensitive isolates from the same location. Interestingly the five study isolates from  
168 India did not cluster together, and were distributed across the 4.3.1 lineage II. The four  
169 cephalosporin resistant isolates from Mumbai, India formed a subclade within the H58 lineage II  
170 and differed by 2 SNPs from the closest isolates within the subclade. However the recently



171 reported ceftriaxone resistant *S. Typhi* from Gurgaon, India clustered within the subclade of  
172 4.3.1 lineage I with a difference of 3 SNPs from the ceftriaxone sensitive isolates. It is therefore  
173 likely that all the ceftriaxone resistant *S. Typhi* isolates from India have evolved independently  
174 from respective geographical locations.

### 175 **Non-IncY plasmids carrying ceftriaxone resistance**

176 The complete circular plasmids of two representative isolates were used as a reference to  
177 reconstruct plasmids from the short read assembly in other isolates. Four study isolates from  
178 Mumbai carried the *bla*<sub>SHV-12</sub> and *qnrB7* AMR genes on an IncX3 plasmid (**Fig. 2**). The  
179 antibiotic resistance loci from the plasmid were found to be a composite transposon inserted into  
180 the IncX3 backbone. However, the plasmid IncN from the Vellore isolate carried *bla*<sub>TEM-1B</sub>,  
181 *bla*<sub>DHA-1</sub>, *qnrB4*, and *sul-1* resistance genes. The IncX3 plasmid responsible for the cephalosporin  
182 resistance in *S. Typhi* in India is very closely related to the IncX3 plasmid in other  
183 Enterobacteriaceae.

184

### 185 **Discussion**

186 Currently, ceftriaxone and azithromycin are the drugs of choice and resistance to these  
187 agents challenges the treatment of typhoid fever. This has been demonstrated by the emergence  
188 of ceftriaxone resistant *S. Typhi* in Pakistan, with resistance to five classes of antimicrobials,  
189 including all three first-line agents, fluoroquinolones and ceftriaxone. This study provides  
190 evolutionary insights into the emergence of cephalosporin resistant *S. Typhi* in India to predict  
191 possible further clonal expansion.

192           The emergence of Indian cephalosporin resistant *S. Typhi* appears to be by multiple  
193 independent genetic events by acquisition of different resistance plasmids. This is in line with the  
194 global emergence of cephalosporin resistance in *S. Typhi* as summarized in Table 1. So far, 18  
195 studies have reported cephalosporin resistant *S. Typhi* across the globe, with the earliest report of  
196 *bla*<sub>CTX-M-15</sub> gene in Western Asia during 2003-2006 [22]. While the majority of reports were  
197 based on phenotypic data, a few have reported genetic AMR and plasmid profiles. Except for the  
198 outbreak event reported from Pakistan [9], all other reports are of sporadic cases from different  
199 locations. Hence there is a lack of a global perspective of the evolution and spread of  
200 cephalosporin resistant *S. Typhi*.

201           In our study, the genetic characterization of cephalosporin resistant *S. Typhi* isolates from  
202 India showed that as in Pakistan, cephalosporin resistant isolates belong to the H58 lineage.  
203 However, within the H58 lineage, the cephalosporin resistant *S. Typhi* were distributed in  
204 different sub-lineages. The Indian isolates belonged to the dominant 4.3.1 lineage II while the  
205 isolates from Pakistan clustered with 4.3.1 lineage I. These results are in agreement with  
206 previous reports as the MDR associated lineage I is dominant in Pakistan and lineage II (QRDR  
207 triple mutants) is more prevalent in India [9, 23-25]. The only exception is the previously  
208 reported ceftriaxone resistant *S. Typhi* from Gurgaon, India which originated from lineage  
209 4.3.1.1 [13]. In contrast to the above observations, isolates from Bangladesh, Democratic  
210 Republic of Congo (DRC) and Philippines clustered with the non-H58 phylogenetic lineages  
211 (26-29).

212           The evolutionary pattern observed in cephalosporin resistant *S. Typhi* in India may not be  
213 driven by acquisition of plasmids already carrying cephalosporin resistance, but by adaptation

214 due to antibiotic usage selection pressure. This is supported by earlier evolutionary events such  
215 as the integration of the MDR gene cassette (composite transposon) in the chromosome and the  
216 replacement of lineage I by lineage II in India [30]. Further, the emergence and regional  
217 dominance of QRDR triple mutant lineage II in India was associated with high fluoroquinolone  
218 exposure in the region [6, 24]. Based on available data, it appears that the H58 lineage I with a  
219 chromosomal AMR cassette and single QRDR mutation can acquire and maintain  
220 extrachromosomal elements, such as plasmids harboring AMR determinants, as in the XDR  
221 Pakistan isolates and in the Indian isolate from Gurgaon. Conversely, lineage II strains with  
222 double/triple QRDR mutations develop cephalosporin resistance by short term adaptation of  
223 resistance plasmids such as IncX3 or IncN. This could probably be the reason for lineage I  
224 acquiring IncY to have had potential to cause larger outbreaks and as well its persistence till  
225 date, which is in contrast to lineage II in India with lack of potential to spread unlike lineage I in  
226 Pakistan. In general, the rise and spread of plasmid mediated AMR in clinical settings is based  
227 on the ability of bacteria to compensate for the initial fitness cost imposed by the plasmid [31].  
228 Since the QRDR triple mutant (lineage II) carries the highest fitness cost among fluoroquinolone  
229 resistant *S. Typhi* [32], the spread of the plasmid-carrying cephalosporin resistant clone may be  
230 limited. Notably, when the lineage can alleviate the cost imposed by the plasmid through  
231 compensatory mutations, the spread of these clones will cause even greater therapeutic  
232 difficulties.

233         The global spread of MDR *S. Typhi* was associated with independent acquisitions of  
234 IncHI1 plasmids of varying plasmid types (PST) at different locations between the 1970s and  
235 1980s [33]. In contrast, a single plasmid type (PST6) of IncHI1 was responsible for the clonal  
236 expansion of H58 haplotype [23, 33]. Similarly in the Pakistan outbreak, a single acquisition

237 event of IncY plasmid harboring *bla*<sub>CTXM-15</sub> led to the expansion of XDR *S. Typhi* (4.3.1.1P) with  
238 a difference of 6 SNPs from the MDR associated *S. Typhi* [9]. Though the fitness of the host  
239 strain may have compromised while acquiring the IncY plasmid, the XDR clone appears to have  
240 alleviated the cost by compensatory evolution. As a result, the IncY plasmid appears to be stable  
241 and maintained in the genome, as XDR outbreaks are still reported from Pakistan [10]. Our data  
242 along with a previous report from northern India [13] indicates that the development of  
243 cephalosporin resistance in *S. Typhi* in India has occurred by at least three independent and  
244 distinct events. This includes the transfer of IncN plasmid in a single isolate, IncX3 in 4 other  
245 isolates and IncY as observed in Pakistan. Plasmid characterization of our study isolates with  
246 respect to phylogenetic lineages indicates a short term adaptation of IncX3/IncN plasmids in H58  
247 lineage II (QRDR triple mutant) which are identified sporadically, while successful host  
248 adaptation of IncY plasmid in XDR H58 lineage I has led to persistence in Pakistan.

249 Although our study is limited in sample size and geographical representation, the preliminary  
250 observation derived from this study highlights the ability of *S. Typhi* to acquire diverse plasmids  
251 to develop cephalosporin resistance. A follow up study on large number of samples, collected  
252 evenly across the country, would be required to establish the rate of evolution and clonal  
253 expansion in these newly discovered cephalosporin resistant *S. Typhi*.

## 254 **Conclusion**

255 Even though ceftriaxone resistant *S. Typhi* are not widely seen in India at present,  
256 emergence and spread is possible due to the current high use of azithromycin and ceftriaxone for  
257 the treatment of typhoid fever. As a result, there are potential risks for the occurrence of plasmid  
258 transmission events. This is based on the following evidence, (i) endemicity of *bla*<sub>SHV</sub> and *bla*<sub>CTX</sub>.

259 *M-15* carrying plasmids in *E. coli* and *Klebsiella* sp. in India favoring horizontal gene transfer to *S.*  
260 Typhi, (ii) high use of ceftriaxone for the management of complicated typhoid fever posing  
261 antibiotic pressure, and (iii) the dominant H58 lineage in India being capable of acquiring  
262 plasmid harboring AMR determinants. Considering the prolonged maintenance of newly  
263 acquired *bla<sub>CTX-M-15</sub>* carrying IncY plasmid in 4.3.1 lineage I in Pakistan, any trigger could  
264 possibly lead to similar events in India. Therefore we propose that MDR H58 lineage II are  
265 capable of acquiring MDR plasmids from other Enterobacteriaceae and could potentially cause a  
266 large outbreak. Hence, monitoring of cephalosporin resistant *S. Typhi* and its lineages associated  
267 with plasmid acquisition is required for early detection, in conjunction with rational use of  
268 antibiotics and prevention strategies for control of enteric fever.

## 269 **Acknowledgments**

270 This project was supported by grants from Bill and Melinda Gates Foundation, USA  
271 (Investment ID INV-009497 OPP1159351) for the Project “National Surveillance System for  
272 Enteric Fever in India”

## 273 **Conflicts of interest**

274 The authors declare that there is no potential conflict of interest

## 275 **Author contribution statement**

276 BV conceived and designed the research, JJJ and AKP supervised the research and wrote the  
277 manuscript. KV, GK, JJ, VN and AM have reviewed and corrected the manuscript. All authors  
278 have read and approved the manuscript.

279

## 280 **References**

- 281 1. Stanaway JD, Reiner RC, Blacker BF, Goldberg EM, Khalil IA, Troeger CE, Andrews JR,  
282 Bhutta ZA, Crump JA, Im J, Marks F. The global burden of typhoid and paratyphoid fevers:  
283 a systematic analysis for the Global Burden of Disease Study 2017. *Lancet Infect Dis*, **2019**;  
284 19: 369-381.
- 285 2. Dougan G, Baker S. *Salmonella enterica* serovar Typhi and the pathogenesis of typhoid  
286 fever. *Annu Rev Microbiol*, **2014**; 68: 317-336.
- 287 3. Crump JA. Progress in typhoid fever epidemiology. *Clin Infect Dis*, **2019**; 68: S4-S9.
- 288 4. Watson CH, Basnyat B, Martineau FP, Kang G, Baker S, Meiring J, Pitzer VE. The invisible  
289 burden: Diagnosing and combatting typhoid fever in Asia and Africa. *Clin Infect Dis*, **2019**;  
290 69: S395-S401.
- 291 5. Browne AJ, Hamadani BH, Kumaran EA, Rao P, Longbottom J, Harriss E, Moore CE,  
292 Dunachie S, Basnyat B, Baker S, Lopez AD. Drug-resistant enteric fever worldwide, 1990 to  
293 2018: a systematic review and meta-analysis. *BMC Med*, **2020**; 18: 1.
- 294 6. Britto CD, Wong VK, Dougan G, Pollard AJ. A systematic review of antimicrobial  
295 resistance in *Salmonella enterica* serovar Typhi, the etiological agent of typhoid. *PLoS Negl*  
296 *Trop Dis*, **2018**; 12: e0006779.

- 297 7. Cuypers WL, Jacobs J, Wong V, Klemm EJ, Deborggraeve S, Van Puyvelde S.  
298 Fluoroquinolone resistance in *Salmonella*: insights by whole-genome sequencing. *Microb*  
299 *Genom*, **2018**; 7: e000195.
- 300 8. Veeraraghavan B, Pragasam AK, Bakthavatchalam YD, Ralph R. Typhoid fever: issues in  
301 laboratory detection, treatment options & concerns in management in developing countries.  
302 *Future Sci OA*, **2018**; 4: FSO312.
- 303 9. Klemm EJ, Shakoor S, Page AJ, Qamar FN, Judge K, Saeed DK.. Emergence of an  
304 extensively drug-resistant *Salmonella enterica* serovar Typhi clone harboring a promiscuous  
305 plasmid encoding resistance to fluoroquinolones and third-generation cephalosporins. *MBio*,  
306 **2018**; 9: e00105-18.
- 307 10. Rasheed F, Saeed M, Alikhan NF, Baker D, Khurshid M, Ainsworth EV, Turner AK, Imran  
308 AA, Rasool MH, Saqalein M, Nisar MA. Emergence of Resistance to Fluoroquinolones and  
309 Third-Generation Cephalosporins in *Salmonella* Typhi in Lahore, Pakistan. *medRxiv*, **2020**.
- 310 11. Ragupathi NK, Sethuvel DP, Shankar BA, Munusamy E, Anandan S, Veeraraghavan B.  
311 Draft genome sequence of *bla*TEM-1-mediated cephalosporin-resistant *Salmonella enterica*  
312 serovar Typhi from bloodstream infection. *J Glob Antimicrob Res*, **2016**; 7: 11-12.
- 313 12. Rodrigues C, Kapil A, Sharma A, Ragupathi NK, Inbanathan FY, Veeraraghavan B, Kang G.  
314 Whole-genome shotgun sequencing of cephalosporin-resistant *Salmonella enterica* serovar  
315 Typhi. *Genome Announc*, **2017**; 5: e01639-16.

- 316 13. Sah R, Donovan S, Seth-Smith H, Bloemberg G, Wüthrich D, Stephan R, Kataria S, Kumar  
317 M, Singla S, Deswal V, Kaur A. A novel lineage of ceftriaxone-resistant *Salmonella* Typhi  
318 from India that is closely related to XDR *S. Typhi* found in Pakistan. *Clin Infect Dis*, **2019**;  
319 ciz1204.
- 320 14. Bale JA, de Pinna EM, Threlfall E, Ward LR. Kauffmann-White Scheme-2007: *Salmonella*  
321 Identification: Serotypes and Antigen Formulae. Centre for Infections, Health Protection  
322 Agency; **2007**.
- 323 15. CaLSI CL. Performance Standards for Antimicrobial Susceptibility Testing: Approved  
324 Twenty-: Document M100-S28. Wayne, PA, USA: CLSI. 2018; **2018**.
- 325 16. Vasudevan K, Ragupathi NK, Jacob JJ, Veeraraghavan B. Highly accurate-single  
326 chromosomal complete genomes using IonTorrent and MinION sequencing of clinical  
327 pathogens. *Genomics*, **2020**; 112: 545-551.
- 328 17. Seemann T. Snippy: fast bacterial variant calling from NGS reads.  
329 <https://github.com/tseemann/snippy>.
- 330 18. Croucher NJ, Page AJ, Connor TR, et al. Rapid phylogenetic analysis of large samples of  
331 recombinant bacterial whole genome sequences using Gubbins. *Nucleic Acids Res*, **2015**; 43:  
332 e15.
- 333 19. Letunic I, Bork P. Interactive tree of life (iTOL) v3: an online tool for the display and  
334 annotation of phylogenetic and other trees. *Nucleic Acids Res* **2016**; 44: W242-W245.



- 335 20. Antipov D, Hartwick N, Shen M, Raiko M, Lapidus A, Pevzner P. plasmidSPAdes:  
336 assembling plasmids from whole genome sequencing data. *Bioinform*, **2016**; 32: 3380-3387.
- 337 21. Grant JR, Stothard P. The CGView Server: A comparative genomics tool for circular  
338 genomes. *Nucleic Acids Res*, **2008**; 36: W181-W184.
- 339 22. Rotimi VO, Jamal W, Pal T, Sovenned A, Albert MJ. Emergence of CTX-M-15 type  
340 extended-spectrum  $\beta$ -lactamase-producing *Salmonella* spp. in Kuwait and the United Arab  
341 Emirates. *J Med Microbiol*, **2008**; 57: 881-886.
- 342 23. Wong VK, Baker S, Pickard DJ, Parkhill J, Page AJ, Feasey NA, Kingsley RA, Thomson  
343 NR, Keane JA, Weill FX, Edwards DJ. Phylogeographical analysis of the dominant  
344 multidrug-resistant H58 clade of *Salmonella* Typhi identifies inter-and intracontinental  
345 transmission events. *Nat Genet*, **2015**; 47: 632-639.
- 346 24. Britto CD, John J, Verghese VP, Pollard AJ. A systematic review of antimicrobial resistance  
347 of typhoidal *Salmonella* in India. *Indian J Med Res*, **2019**; 149: 151.
- 348 25. Pragasam AK, Pickard D, Wong V, Dougan G, Kang G, Thompson A, John J, Balaji V,  
349 Mutreja A. Phylogenetic Analysis Indicates a Longer Term Presence of the Globally  
350 Distributed H58 Haplotype of *Salmonella* Typhi in Southern India. *Clin Infect Dis*, **2020**;  
351 ciz1112.
- 352 26. Rahman SI, Dyson ZA, Klemm EJ, Khanam F, Holt KE, Chowdhury EK, Dougan G, Qadri  
353 F. Population structure and antimicrobial resistance patterns of *Salmonella* Typhi isolates in  
354 urban Dhaka, Bangladesh from 2004 to 2016. *PLOS Neglect Trop Dis*, **2020**; 14: e0008036.

- 355 27. Tanmoy AM, Westeel E, De Bruyne K, Goris J, Rajoharison A, Sajib MS, van Belkum A,  
356 Saha SK, Komurian-Pradel F, Endtz HP. *Salmonella enterica* Serovar Typhi in Bangladesh:  
357 exploration of genomic diversity and antimicrobial resistance. MBio, **2018**; 9: e02112-18.
- 358 28. Phoba MF, Barbé B, Lunguya O, Masendu L, Lulengwa D, Dougan G, Wong VK, Bertrand  
359 S, Ceysens PJ, Jacobs J, Van Puyvelde S. *Salmonella enterica* serovar Typhi producing  
360 CTX-M-15 extended spectrum  $\beta$ -lactamase in the Democratic Republic of the Congo. Clin  
361 Infect Dis, **2017**; 65: 1229-1231.
- 362 29. Hendriksen RS, Leekitcharoenphon P, Mikoleit M, Jensen JD, Kaas RS, Roer L. Genomic  
363 dissection of travel-associated extended-spectrum-beta-lactamase-producing *Salmonella*  
364 *enterica* serovar Typhi isolates originating from the Philippines: a one-off occurrence or a  
365 threat to effective treatment of typhoid fever?. J Clin Microbiol, **2015**; 53: 677-680.
- 366 30. Ingle DJ, Nair S, Hartman H, Ashton PM, Dyson ZA, Day M, Freedman J, Chattaway MA,  
367 Holt KE, Dallman TJ. Informal genomic surveillance of regional distribution of *Salmonella*  
368 Typhi genotypes and antimicrobial resistance via returning travellers. PLoS Neglect Trop  
369 Dis, **2019**; 13: e0007620.
- 370 31. San Millan A. Evolution of plasmid-mediated antibiotic resistance in the clinical context.  
371 Trends Microbiol, **2018**; 26: 978-985.
- 372 32. Baker S, Duy PT, Nga TV, Dung TT, Phat VV, Chau TT, Turner AK, Farrar J, Boni MF.  
373 Fitness benefits in fluoroquinolone-resistant *Salmonella* Typhi in the absence of  
374 antimicrobial pressure. Elife, **2013**; 2: e01229.

- 375 33. Holt KE, Phan MD, Baker S, Duy PT, Nga TV, Nair S, Turner AK, Walsh C, Fanning S,  
376 Farrell-Ward S, Dutta S. Emergence of a globally dominant IncHI1 plasmid type associated  
377 with multiple drug resistant typhoid. *PLoS Neglect Trop Dis*, **2011**; 5: e1245.

378 **Table 1: Molecular fingerprint of cephalosporin resistant *S. Typhi***

| Country of Origin<br>(Reference) | Location                     | Isolate Id<br>&<br>Accession No. | Year          | Acquired Resistance                |                                                                                                               |                                       | Chromosomal<br>resistance<br>(QRDR) | Lineage                     |
|----------------------------------|------------------------------|----------------------------------|---------------|------------------------------------|---------------------------------------------------------------------------------------------------------------|---------------------------------------|-------------------------------------|-----------------------------|
|                                  |                              |                                  |               | Beta<br>lactamases                 | Other AMR<br>determinants                                                                                     | Plasmids                              |                                     |                             |
| DRC<br>(28)                      |                              | ERR1862943                       | 2015          | <i>CTX-M-15</i> ,<br><i>TEM-1D</i> | <i>dfrA7</i> , <i>sul1</i> , <i>aac6'</i>                                                                     | IncY                                  | S83F                                | Non-H58<br>(2.5.1)          |
| Philippines<br>(29)              | Travel<br>associated         | ERS525820<br>ERS525821           | 2012          | <i>TEM-1B</i> ,<br><i>SHV-12</i>   | <i>dfrA19</i> , <i>aac6'</i> , <i>aph3'</i> ,<br><i>aph6'</i> , <i>tetD</i> , <i>MCR-9</i>                    | IncHI2                                | Absent                              | Non-H58 (3)                 |
| Pakistan<br>(9)                  | Sindh<br>Outbreak            | ERR2093236 -<br>ERR2093334       | 2016-<br>2017 | <i>CTX-M-15</i> ,<br><i>TEM-1</i>  | <i>dfrA7</i> , <i>catA1</i> , <i>sul1</i> and<br><i>sul2</i> , <i>qnrS</i> , <i>StrAB</i>                     | IncY                                  | S83F                                | H58 Lineage I<br>(4.3.1.1P) |
| Bangladesh<br>(26, 27)           | Dhaka                        | ERR2059823                       | 2000          | <i>CTX-M-15</i> ,<br><i>TEM-1B</i> | <i>aac6'</i>                                                                                                  | IncI1                                 | S83Y                                | Non-H58                     |
|                                  | Gurgaon,<br>Haryana<br>(n=2) | Gurgaon01<br>(ERR3527963)        | 2019          | <i>TEM-1B</i> ,<br><i>CTX-M-15</i> | <i>dfrA14</i> , <i>sul1/2</i> , <i>tetA</i> ,<br><i>qnrS1</i> , <i>aac6'</i> , <i>aph6'</i> ,<br><i>aph3'</i> | IncY (lost<br>while sub<br>culturing) | S83Y                                | H58 Lineage I<br>(4.3.1.1)  |



|          |            |      |         |                           |      |            |                |
|----------|------------|------|---------|---------------------------|------|------------|----------------|
| Vellore* | CMCST_CEP  | 2015 | TEM-1B, | <i>qnrB4, aac6', sul1</i> | IncN | S83F, E84K | H58 Lineage II |
| (n=1)    | R_1LSAR000 |      | DHA     |                           |      |            | (4.3.1.2)      |
|          | 00000      |      |         |                           |      |            |                |

---

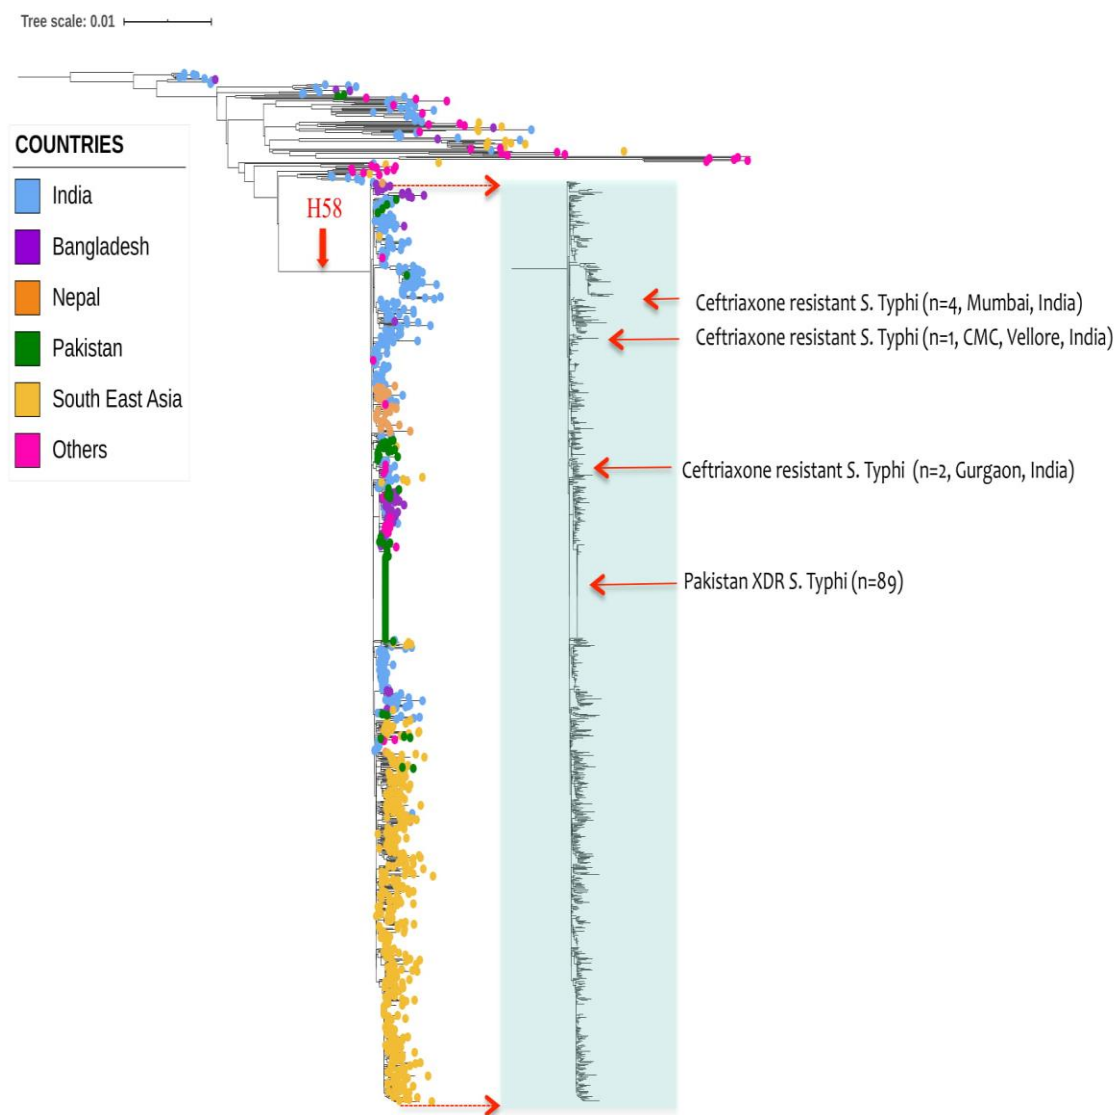

379

380

381

382

383

384

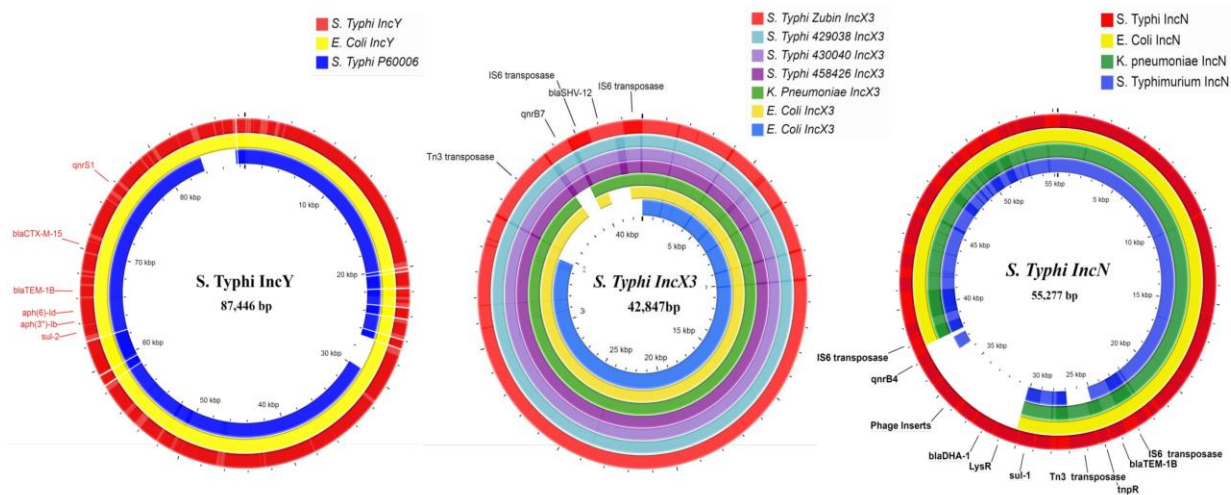

385

386

387

388

389

390

391

392



393

394 **Figure Legends:**

395 **Fig 1:** Maximum likelihood tree of 1005 *S. Typhi* (H58 and non-H58) inferred from 2072 SNPs  
396 and rooted against the reference genome CT18. Light shaded box indicates non-H58 population,  
397 while the rest are H58 group. The tips of the tree are coloured according to the geographical  
398 origin of the genomes. Red colored squared boxes with arrows indicates the position of  
399 ceftriaxone resistant *S. Typhi* in the context of global phylogeny, indicating similarity with  
400 respect to the geographical locations. Tree scale indicates the number of substitutions per  
401 genome.

402 **Fig 2:** Circular representation of plasmids assembled from *S. Typhi* isolates displayed using CG  
403 view server with reference genomes. (a) The IncY plasmid from cephalosporin resistant *S. Typhi*  
404 isolate from Gurgaon, India is compared with similar plasmids identified from XDR Pakistan *S.*  
405 *Typhi* (Plasmid p60006) and highly similar *E. coli* IncY plasmid. (b) Comparison of IncX3  
406 plasmid from cephalosporin resistant Indian *S. Typhi* isolates (n=4) with global  
407 Enterobacteriaceae associated IncX3 plasmids. (c) The IncN plasmid assembled from  
408 cephalosporin resistant *S. Typhi* Vellore isolate was compared with representative isolates from  
409 Genbank

410

411 **Table Legends:**

412 Table 1: Molecular fingerprint of cephalosporin resistant *S. Typhi*

413
